# Supplementary material
Source: HighWire-hosted journal article supplement (http://www.jrheum.org/highwire/filestream/29800/field_highwire_adjunct_files/0/151067DataSuppl.pdf)
Supplement: 151067DataSuppl.pdf [file 151067DataSuppl.pdf]

## ONLINE SUPPLEMENTARY DATA

*Supplementary Table 1.* Demographics and clinical characteristics of the total Oslo University Hospital ASS cohort.

|                             | <b>Total<br/>(N=96)</b> | <b>Alive<br/>(N=70)</b> | <b>Deceased<br/>(N=26)</b> | P-value |
|-----------------------------|-------------------------|-------------------------|----------------------------|---------|
| Female, n (%)               | 67 (70)                 | 47 (67)                 | 20 (77)                    | 0.875   |
| Jo1, n (%)                  | 79 (82)                 | 55 (79)                 | 24 (92)                    | 0.13    |
| PL7 / PL12 /other anti-aaRS | 7 / 10 / 0              | 6 / 9                   | 1 / 1                      | n.a     |
| Myositis, n (%)             | 73 (76)                 | 53 (76)                 | 20 (77)                    | 0.902   |
| ILD, n (%)                  | 90 (94)                 | 66 (94)                 | 24 (92)                    | 0.722   |
| Acute onset of ILD, n/N (%) | 18/90 (20)              | 10/66 (15)              | 8/24 (33)                  | 0.057   |
| >65 yrs at diagnosis, n (%) | 15 (16)                 | 7 (10)                  | 8 (31)                     | 0.024   |
| Anti-SSA, n (%)             | 69 (72)                 | 54 (77)                 | 15 (58)                    | 0.06    |
| Skin manifestations, n (%)  | 42 (44)                 | 30 (43)                 | 12 (42)                    | 0.772   |
| Mechanical hands, n (%)     | 42 (44)                 | 36 (51)                 | 6 (23)                     | 0.013   |
| Raynaud's, n/N (%)          | 49/92 (53)              | 38/70 (54)              | 11/22 (50)                 | 0.725   |
| Arthralgia/arthritis, n (%) | 71 (74)                 | 51 (73)                 | 20 (77)                    | 0.687   |

ILD = interstitial lung disease, n.a. = not available

*Supplementary Table 2.* Univariable and multivariable analyses on FVC%, DLCO% and ILD extent.

| <b>Dependent Variables/Univariable Analysis</b>   |                   |                 |                |                   |               |                |                       |               |                |
|---------------------------------------------------|-------------------|-----------------|----------------|-------------------|---------------|----------------|-----------------------|---------------|----------------|
| <b>Independent Variables</b>                      | <b>FVC%</b>       |                 |                | <b>DLCO%</b>      |               |                | <b>Extent of ILD%</b> |               |                |
|                                                   | <b>Regr coeff</b> | <b>95% CI</b>   | <b>p-value</b> | <b>Regr coeff</b> | <b>95% CI</b> | <b>p-value</b> | <b>Regr coeff</b>     | <b>95% CI</b> | <b>p-value</b> |
| Disease Duration                                  | -.077             | -.128<br>-.025  | 0.004          |                   |               | 0.133          |                       |               | 0.334          |
| SS-A positivity                                   | -16.5             | -29.8- -<br>3.3 | 0.015          |                   |               | 0.121          |                       |               | 0.658          |
| Acute onset ILD                                   |                   |                 | 0.439          |                   |               | 0.695          |                       |               | 0.966          |
| ASS subgroup                                      |                   |                 | 0.265          |                   |               | 0.529          |                       |               | 0.483          |
| <b>Dependent Variables/Multivariable Analysis</b> |                   |                 |                |                   |               |                |                       |               |                |
| <b>Independent Variables</b>                      | <b>FVC%</b>       |                 |                | <b>DLCO%</b>      |               |                | <b>Extent of ILD%</b> |               |                |
|                                                   | <b>Regr coeff</b> | <b>95% CI</b>   | <b>p-value</b> | <b>Regr coeff</b> | <b>95% CI</b> | <b>p-value</b> | <b>Regr coeff</b>     | <b>95% CI</b> | <b>p-value</b> |
| Disease Duration                                  | -.059             | -.114- .0<br>04 | 0.036          |                   |               | 0.158          |                       |               | 0.172          |

|                    |       |                 |       |  |  |       |  |  |       |
|--------------------|-------|-----------------|-------|--|--|-------|--|--|-------|
| SS-A positivity    | -13.3 | -26.6-<br>-.040 | 0.049 |  |  | 0.174 |  |  | 0.646 |
| Acute onset<br>ILD |       |                 | 0.216 |  |  | 0.520 |  |  | 0.836 |
| ASS subgroup       |       |                 | 0.712 |  |  | 0.312 |  |  | 0.288 |

FVC; Forced Vital Capacity, DLCO; Diffusion Capacity for Carbon Monoxide, ILD; Interstitial Lung Disease, ASS; Anti-Synthetase Syndrome, Regr coeff; Regression Coefficient, CI; Confidence Interval
